# Supplementary material for: Molecular identification of methane monooxygenase and quantitative analysis of methanotrophic endosymbionts under laboratory maintenance in Bathymodiolus platifrons from the South China Sea
Source: PeerJ. 2017 Aug 7;5:e3565. doi: 10.7717/peerj.3565 (PMC5553348; doi:10.7717/peerj.3565)
Supplement: Supplemental Information 1 — The qPCR raw data of symbiont pomA, pmoB and pmoC genes and host ACTB and RPL15. [file peerj-05-3565-s001.xlsx]

## Sheet: qPCR-raw-data
Time/Group	Reference_1	Ct_rep1	Ct_rep2	Ct_rep3	Ct_average	Reference_gene2	Ct_rep1	Ct_rep2	Ct_rep3	Ct_average	Target_gene1	Ct_rep1	Ct_rep2	Ct_rep3	Ct_average	Target_gene2	Ct_rep1	Ct_rep2	Ct_rep3	Ct_average	Target_gene3	Ct_rep1	Ct_rep2	Ct_rep3	Ct_average
FC	ACTB	25.47	24.68	25.18	25.11	RPL15	22.55	24.05	23.32	23.3067	pmoA	19.56	19.56	19.34	19.4867	pmoB	19.78	19.79	19.97	19.8467	pmoC	19.47	19.46	19.93	19.62
FC	ACTB	25.22	24.54	24.34	24.7	RPL15	24.47	24.06	23.61	24.0467	pmoA	19.78	19.55	19.41	19.58	pmoB	19.76	19.87	19.65	19.76	pmoC	19.39	19.42	19.86	19.5567
FC	ACTB	25.12	24.5	24.51	24.71	RPL15	24.46	24.04	23.44	23.98	pmoA	19.29	19.43	19.46	19.3933	pmoB	19.58	19.56	19.45	19.53	pmoC	19.1	19.43	19.79	19.44
FC	ACTB	24.77	24.62	23.95	24.4467	RPL15	24.25	23.94	23.87	24.02	pmoA	19.64	19.67	19.95	19.7533	pmoB	19.44	19.8	20.67	19.97	pmoC	19.54	19.42	19.7	19.5533
FC	ACTB	24.88	24.17	23.99	24.3467	RPL15	24.23	24.15	23.62	24	pmoA	19.44	19.37	19.59	19.4667	pmoB	19.48	19.51	19.59	19.5267	pmoC	18.92	19.54	19.67	19.3767
0d	ACTB	24.62	24.25	23.15	24.0067	RPL15	23.28	23.81	23.14	23.41	pmoA	18.73	18.74	18.97	18.8133	pmoB	19.28	18.6	18.58	18.82	pmoC	18.47	18.61	18.79	18.6233
0d	ACTB	25.16	24.89	24.08	24.71	RPL15	24.76	24.36	25.41	24.8433	pmoA	20.63	20.73	21	20.7867	pmoB	21.18	20.8	20.81	20.93	pmoC	20.44	20.28	20.93	20.55
0d	ACTB	25.5	25.6	25.21	25.4367	RPL15	24.25	24.12	24.64	24.3367	pmoA	20.81	21.19	20.95	20.9833	pmoB	21.11	21.25	21.39	21.25	pmoC	20.83	20.97	21.46	21.0867
0d	ACTB	25.44	24.76	24.6	24.9333	RPL15	26.64	23.6	25.1	25.1133	pmoA	20.56	20.53	20.54	20.5433	pmoB	20.57	20.75	20.53	20.6167	pmoC	20.22	20.47	20.76	20.4833
0d	ACTB	24.84	24.49	24.1	24.4767	RPL15	24.79	24.1	24.96	24.6167	pmoA	20.09	20.75	20.11	20.3167	pmoB	20.25	20.29	20.07	20.2033	pmoC	19.88	20.04	20.19	20.0367
7dC+	ACTB	25	24.28	24.15	24.4767	RPL15	24.61	24.63	24.79	24.6767	pmoA	20.16	20.3	20.28	20.2467	pmoB	20.32	20.45	20.39	20.3867	pmoC	20.07	20.27	20.57	20.3033
7dC+	ACTB	25.87	25.25	25.08	25.4	RPL15	24.91	25.27	24.72	24.9667	pmoA	20.36	20.36	20.48	20.4	pmoB	20.5	20.37	20.12	20.33	pmoC	20.04	20.26	20.68	20.3267
7dC+	ACTB	25.75	25.38	25.1	25.41	RPL15	25.02	24.58	24.42	24.6733	pmoA	20.82	20.98	20.85	20.8833	pmoB	21.02	21.03	20.86	20.97	pmoC	20.66	20.89	21.23	20.9267
7dC+	ACTB	24.05	23.1	23	23.3833	RPL15	24.21	24.59	24.18	24.3267	pmoA	20.82	20.71	20.94	20.8233	pmoB	20.77	20.98	20.78	20.8433	pmoC	20.69	20.96	21.31	20.9867
7dC-	ACTB	24.84	25.29	24.1	24.7433	RPL15	24.97	24.62	24.5	24.6967	pmoA	20.1	19.96	20.09	20.05	pmoB	20.05	20.06	19.86	19.99	pmoC	19.99	19.98	20.29	20.0867
7dC-	ACTB	25.91	25	25.31	25.4067	RPL15	26.05	25.8	25.62	25.8233	pmoA	21.27	21.29	20.77	21.11	pmoB	21.76	21.33	21.3	21.4633	pmoC	21.1	21.25	21.6	21.3167
7dC-	ACTB	24.59	24.18	23.93	24.2333	RPL15	24.63	24.87	24.47	24.6567	pmoA	20.01	19.97	19.96	19.98	pmoB	20.05	19.95	19.98	19.9933	pmoC	19.54	19.92	20.08	19.8467
7dC-	ACTB	25.52	24.94	24.71	25.0567	RPL15	24.51	24.91	24.88	24.7667	pmoA	20.14	20.01	20.2	20.1167	pmoB	20.15	20.11	20.1	20.12	pmoC	19.83	20.23	20.33	20.13
7dC-	ACTB	25.55	24.96	24.69	25.0667	RPL15	24.58	25.49	25.22	25.0967	pmoA	20.82	20.55	20.48	20.6167	pmoB	20.8	20.75	20.7	20.75	pmoC	20.32	20.59	20.88	20.5967
14dC+	ACTB	24.37	23.8	23.8	23.99	RPL15	24.71	24.8	24.8	24.77	pmoA	20.63	20.53	20.57	20.5767	pmoB	20.65	20.62	20.57	20.6133	pmoC	20.37	20.52	20.61	20.5
14dC+	ACTB	24.22	24.14	23.34	23.9	RPL15	24.47	24.48	24.51	24.4867	pmoA	20.68	20.73	20.85	20.7533	pmoB	20.93	20.84	20.61	20.7933	pmoC	20.55	20.58	20.97	20.7
14dC+	ACTB	24.49	24.09	24.03	24.2033	RPL15	24.68	24.49	24.45	24.54	pmoA	19.91	19.97	20.06	19.98	pmoB	20.11	20	19.93	20.0133	pmoC	19.58	19.79	19.91	19.76
14dC+	ACTB	24.6	24.5	24.26	24.4533	RPL15	23.87	23.89	23.75	23.8367	pmoA	20.89	21.71	21.07	21.2233	pmoB	21.01	20.83	20.95	20.93	pmoC	20.57	20.79	21.12	20.8267
14dC+	ACTB	25.53	25.27	25.24	25.3467	RPL15	24.03	23.87	23.95	23.95	pmoA	21.52	21.41	21.37	21.4333	pmoB	21.49	21.49	21.6	21.5267	pmoC	21.26	20.91	21.54	21.2367
14dC-	ACTB	25.29	24.67	24.75	24.9033	RPL15	24.09	24.1	23.93	24.04	pmoA	21.16	21.59	21.43	21.3933	pmoB	21.5	21.59	21.49	21.5267	pmoC	21.23	21.51	21.66	21.4667
14dC-	ACTB	25.09	24.94	24.55	24.86	RPL15	24.94	24.31	24.27	24.5067	pmoA	21.21	21.18	21.24	21.21	pmoB	21.06	21.12	21.12	21.1	pmoC	20.65	20.83	21.17	20.8833
14dC-	ACTB	25.58	25.23	24.95	25.2533	RPL15	24.78	24.59	24.28	24.55	pmoA	21.57	21.63	21.56	21.5867	pmoB	21.6	21.76	21.51	21.6233	pmoC	21.43	21.55	21.81	21.5967
14dC-	ACTB	24.66	24.35	24.05	24.3533	RPL15	24.65	24.61	25.27	24.8433	pmoA	21.77	21.88	21.65	21.7667	pmoB	21.97	21.92	21.76	21.8833	pmoC	21.5	21.67	21.93	21.7
14dC-	ACTB	25.04	24.89	24.49	24.8067	RPL15	24.8	24.98	25.42	25.0667	pmoA	21.36	21.16	21.08	21.2	pmoB	21.23	21.33	21.27	21.2767	pmoC	20.91	20.95	21.59	21.15
24dC+	ACTB	25.56	25.1	24.87	25.1767	RPL15	24.97	24.49	24.15	24.5367	pmoA	21.05	21.21	21.16	21.14	pmoB	21.1	21.17	21.26	21.1767	pmoC	21	20.87	21.35	21.0733
24dC+	ACTB	24.72	24.4	24.04	24.3867	RPL15	24.18	24.54	24.2	24.3067	pmoA	22.97	23.07	22.95	22.9967	pmoB	22.88	22.84	22.94	22.8867	pmoC	22.78	22.77	23.2	22.9167
24dC+	ACTB	24.44	24.04	23.69	24.0567	RPL15	25.25	25	24.79	25.0133	pmoA	21.04	21.23	21.17	21.1467	pmoB	21.23	21.38	21.23	21.28	pmoC	21.03	21.14	21.4	21.19
24dC+	ACTB	24.09	23.71	23.55	23.7833	RPL15	25.19	25.36	25.67	25.4067	pmoA	21.17	21.4	21.15	21.24	pmoB	21.28	21.13	21.11	21.1733	pmoC	21.03	21.08	21.49	21.2
24dC+	ACTB	25.24	24.74	24.47	24.8167	RPL15	25.43	24.35	24.52	24.7667	pmoA	21.97	22.25	22.16	22.1267	pmoB	22.22	22.29	22.06	22.19	pmoC	21.95	21.95	22.21	22.0367
24dC-	ACTB	25.2	24.9	24.75	24.95	RPL15	24.08	24.02	24.13	24.0767	pmoA	23.95	24	23.88	23.9433	pmoB	24.06	24.23	24.07	24.12	pmoC	23.68	23.87	24.33	23.96
24dC-	ACTB	25.75	25.2	24.95	25.3	RPL15	25.1	24.95	24.97	25.0067	pmoA	22.18	22.24	22.05	22.1567	pmoB	22.25	22.43	22.35	22.3433	pmoC	22.12	22.28	22.62	22.34
24dC-	ACTB	24.96	24.47	24.14	24.5233	RPL15	24.07	24.46	25.08	24.5367	pmoA	22.79	22.85	22.89	22.8433	pmoB	22.88	22.89	22.91	22.8933	pmoC	22.85	22.87	23.29	23.0033
24dC-	ACTB	24.49	23.95	23.71	24.05	RPL15	24.17	24.2	23.73	24.0333	pmoA	22.31	22.15	22.36	22.2733	pmoB	22.54	22.39	22.43	22.4533	pmoC	22.33	22.2	22.55	22.36
24dC-	ACTB	23.92	23.44	23.18	23.5133	RPL15	24.04	24.02	23.96	24.0067	pmoA	22.46	22.5	22.42	22.46	pmoB	22.56	22.51	22.33	22.4667	pmoC	22.25	22.43	22.73	22.47
34dC+	ACTB	25.46	25.09	24.7	25.0833	RPL15	24.53	24.24	24.21	24.3267	pmoA	22.33	22.33	22.08	22.2467	pmoB	22.24	22.43	22.22	22.2967	pmoC	22.11	22.14	22.74	22.33
34dC+	ACTB	25.02	24.62	24.37	24.67	RPL15	24.36	24.56	25.4	24.7733	pmoA	20.94	20.83	20.77	20.8467	pmoB	21.08	21.02	21.06	21.0533	pmoC	20.7	20.84	21.1	20.88
34dC+	ACTB	24.63	24.91	24.19	24.5767	RPL15	24.59	24.39	23.85	24.2767	pmoA	23.11	22.99	23.19	23.0967	pmoB	23.27	23.06	23.03	23.12	pmoC	22.9	22.97	23.37	23.08
34dC+	ACTB	25.01	25.52	24.34	24.9567	RPL15	24.04	24.07	24.23	24.1133	pmoA	21.65	21.57	21.66	21.6267	pmoB	21.8	21.83	21.66	21.7633	pmoC	21.48	21.52	21.88	21.6267
34dC+	ACTB	24.96	24.76	24.39	24.7033	RPL15	24.35	24.09	24.22	24.22	pmoA	21.19	21.31	21.33	21.2767	pmoB	21.49	21.57	21.23	21.43	pmoC	20.99	21.18	21.56	21.2433
34dC-	ACTB	25.95	26.34	26.03	26.1067	RPL15	24.62	24.93	24.96	24.8367	pmoA	23.36	23.64	23.99	23.6633	pmoB	23.29	23.51	23.27	23.3567	pmoC	23.61	23.52	23.43	23.52
34dC-	ACTB	24.65	24.63	24.43	24.57	RPL15	24.32	24.21	23.9	24.1433	pmoA	26.64	26.89	27.01	26.8467	pmoB	26.91	26.97	26.92	26.9333	pmoC	26.83	27.01	26.94	26.9267
34dC-	ACTB	24.55	24.21	24.48	24.4133	RPL15	24.17	24.19	24.19	24.1833	pmoA	22.99	23.31	23.54	23.28	pmoB	23.61	23.77	23.62	23.6667	pmoC	23.74	23.83	23.64	23.7367
34dC-	ACTB	25	25.2	25.04	25.08	RPL15	24.33	24.45	24.24	24.34	pmoA	21.92	22.3	22.65	22.29	pmoB	22.32	22.08	22.49	22.2967	pmoC	22.16	22.33	22.46	22.3167
34dC-	ACTB	25.19	25.31	25.18	25.2267	RPL15	23.82	24.63	24.45	24.3	pmoA	23.71	23.75	24.1	23.8533	pmoB	23.39	23.71	23.79	23.63	pmoC	23.7	23.81	23.78	23.7633
